# Supplementary material for: Tunable dual-emitting shell-crosslinked nano-objects as single-component ratiometric pH-sensing materials
Source: Royal Society of Chemistry journal article supplement (doi:10.1039/c1jm11854d), 2011-01-01
Supplement: c1jm11854d.pdf [file c1jm11854d.pdf]

Supplementary Material (ESI) for Journal of Materials Chemistry  
This journal is (c) The Royal Society of Chemistry 2010

## Electronic Supplementary Information (ESI)

# Tunable dual-emitting shell-crosslinked nano-objects as single-component ratiometric pH-sensing materials

Nam S. Lee,<sup>a</sup> Guorong Sun,<sup>a</sup> Lily Yun Lin,<sup>a</sup> William L. Neumann,<sup>b</sup> John N. Freskos,<sup>c</sup> Amolkumar Karwa,<sup>c</sup> Jeng J. Shieh,<sup>c</sup> Richard B. Dorshow<sup>c</sup> and Karen L. Wooley<sup>\*a</sup>

<sup>a</sup> Department of Chemistry and Chemical Engineering, Texas A&M University, College Station, TX 77842, USA.

Fax: 979-862-1137; Tel: 979-845-4077; E-mail: wooley@chem.tamu.edu

<sup>b</sup> Department of Pharmaceutical Sciences, Southern Illinois University-Edwardsville School of Pharmacy, Edwardsville, IL 62026, USA.

Fax: 618-650-5145; Tel: 618-650-5088

<sup>c</sup> Covidien Pharmaceuticals R&D, Hazelwood, MO 63042, USA.

Fax: 314-654-8900; Tel: 314-654-3396

*Preparation of SCR-Bs:* To a 50-mL round bottom flask equipped with a magnetic stir bar was added a solution of **1** in nanopure H<sub>2</sub>O (22 mL or 21 mL, 57 μmol or 54 μmol of carboxylic acid residues). To this solution, was added a solution of **B** (0.30 mg, 0.45 μmol (0.79 mol% relative to the acrylic acid residues) for 2% crosslinking extent; 1.5 mg, 2.3 μmol (3.9 mol% relative to the acrylic acid residues) for 7% crosslinking extent; or 3.0 mg, 4.4 μmol (7.9 mol% relative to the acrylic acid residues) for 12% crosslinking extent). The reaction mixture was allowed to stir at rt for 2 h. To this solution was added, dropwise *via* a syringe pump over 1 h, a solution of 1-[3'-(dimethylamino)propyl]-3-ethylcarbodiimide methiodide (EDCI): 0.34 mg, 1.1 μmol (stoichiometric) for 2% crosslinking extent; 1.7 mg, 5.7 μmol (stoichiometric) for 7% crosslinking extent; 3.4 mg, 11 μmol (stoichiometric) for 12% crosslinking extent); 0.52 mg, 1.8 μmol (2 molar excess) for 2% crosslinking extent; 2.6 mg, 8.8 μmol (2 molar excess) for 7% crosslinking extent or 5.2 mg, 18 μmol (2 molar excess) for 10% crosslinking extent and the reaction mixture was further stirred at rt for 16 h. Finally, the reaction mixture was transferred to pre-soaked dialysis tubing (MWCO *ca.* 3,500 Da) and dialyzed against 5 mM PBS (5 mM NaCl, pH 7.4) for a day then nanopure water for another day to remove the non-attached crosslinker, excess small molecule starting materials and by-products, and afford aqueous solutions of shell-crosslinked cylinder, **SCR-B2%**, **SCR-B7%**, **SCR-B12%**, **SCR-B2%**, **SCR-B7%** or **SCR-B10%** (final polymer concentration: 0.30 mg/mL, 0.29 mg/mL or 0.28 mg/mL for stoichiometric addition of EDCI and 0.23 mg/mL, 0.23 mg/mL or 0.23 mg/mL for 2 molar excess amount of EDCI, respectively—where in each case, the % crosslinking was determined by UV-vis spectroscopic measurement of the amount of crosslinker remaining after purification). SCR solutions for UV-vis, and fluorescence studies were further partitioned into four vials each containing 5 mM PBS (with 5 mM NaCl) at pH values of 4.6, 6.4, 7.4 and 8.4. SCRs measured 23 ± 2 nm in width and 100 nm to a micron length, by TEM.

*Preparation of SCR-Cs:* To a 50-mL round bottom flask equipped with a magnetic stir bar was added a solution of **1** in nanopure H<sub>2</sub>O (28 mL or 21 mL, 72 μmol or 54 μmol of carboxylic acid residues). To this solution, was added a solution of **C** (0.34 mg, 0.56 μmol (0.79 mol% relative to the acrylic acid residues) for 2% crosslinking extent; 1.7 mg, 2.8 μmol (3.9 mol% relative to the acrylic acid residues) for 7% crosslinking extent; or 3.4 mg, 5.6 μmol (7.9 mol% relative to the acrylic acid residues) for 14% crosslinking extent). The reaction mixture was allowed to stir at rt for 2 h. To this solution was added, dropwise *via* a syringe pump over 1 h, a solution of 1-[3'-(dimethylamino)propyl]-3-ethylcarbodiimide methiodide (EDCI): 0.42 mg, 1.4 μmol (stoichiometric) for 2% crosslinking extent; 2.1 mg, 7.2 μmol (stoichiometric) for 7% crosslinking extent; 4.3 mg, 14 μmol (stoichiometric) for 14% crosslinking extent; 0.52 mg, 1.8 μmol (2 molar excess) for 2% crosslinking extent; 2.6 mg, 8.8 μmol (2 molar excess)

Supplementary Material (ESI) for Journal of Materials Chemistry  
This journal is (c) The Royal Society of Chemistry 2010

for 6% crosslinking extent or 5.2 mg, 17  $\mu\text{mol}$  (2 molar excess) for 3% crosslinking extent) and the reaction mixture was further stirred at rt for 16 h. Finally, the reaction mixture was transferred to pre-soaked dialysis tubing (MWCO *ca.* 3,500 Da) and dialyzed against 5 mM PBS (5 mM NaCl, pH 7.4) for a day then nanopure water for another day to remove the non-attached crosslinker, excess small molecule starting materials and by-products, and afford aqueous solutions of shell-crosslinked cylinder, **SCR-C2%**, **SCR-C7%**, **SCR-C14%**, **SCR-C2%**, **SCR-C6%** or **SCR-C3%** (final polymer concentration: 0.29 mg/mL, 0.28 mg/mL or 0.27 mg/mL for stoichiometric addition of EDCI and 0.23 mg/mL, 0.23 mg/mL or 0.22 mg/mL for 2 molar excess amount of EDCI, respectively—where in each case, the % crosslinking was determined by UV-vis spectroscopic measurement of the amount of crosslinker remaining after purification). SCR solutions for UV-vis, and fluorescence studies were further partitioned into four vials each containing 5 mM PBS (with 5 mM NaCl) at pH values of 4.6, 6.4, 7.4 and 8.4. SCRs measured  $23 \pm 2$  nm in width and 100 nm to a micron length, by TEM.

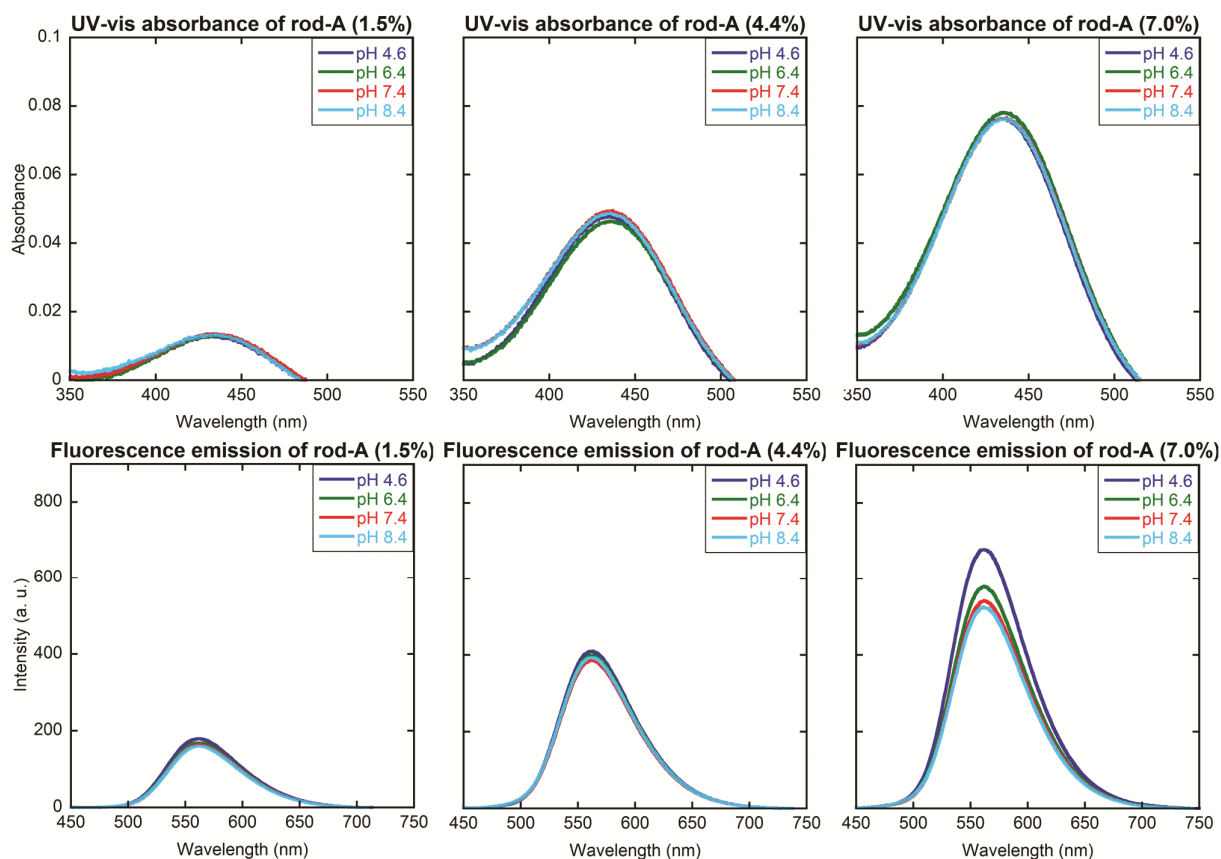

**Figure S1.** UV-vis absorbance and fluorescence emission spectra of physical mixture of rod-shaped micelles and chromophoric crosslinker A at 1.5, 4.4 or 7.0% loading, based upon the molar percentage of aliphatic amine of the crosslinker to the carboxylic acid groups of the block copolymer assemblies.

Supplementary Material (ESI) for Journal of Materials Chemistry  
This journal is (c) The Royal Society of Chemistry 2010

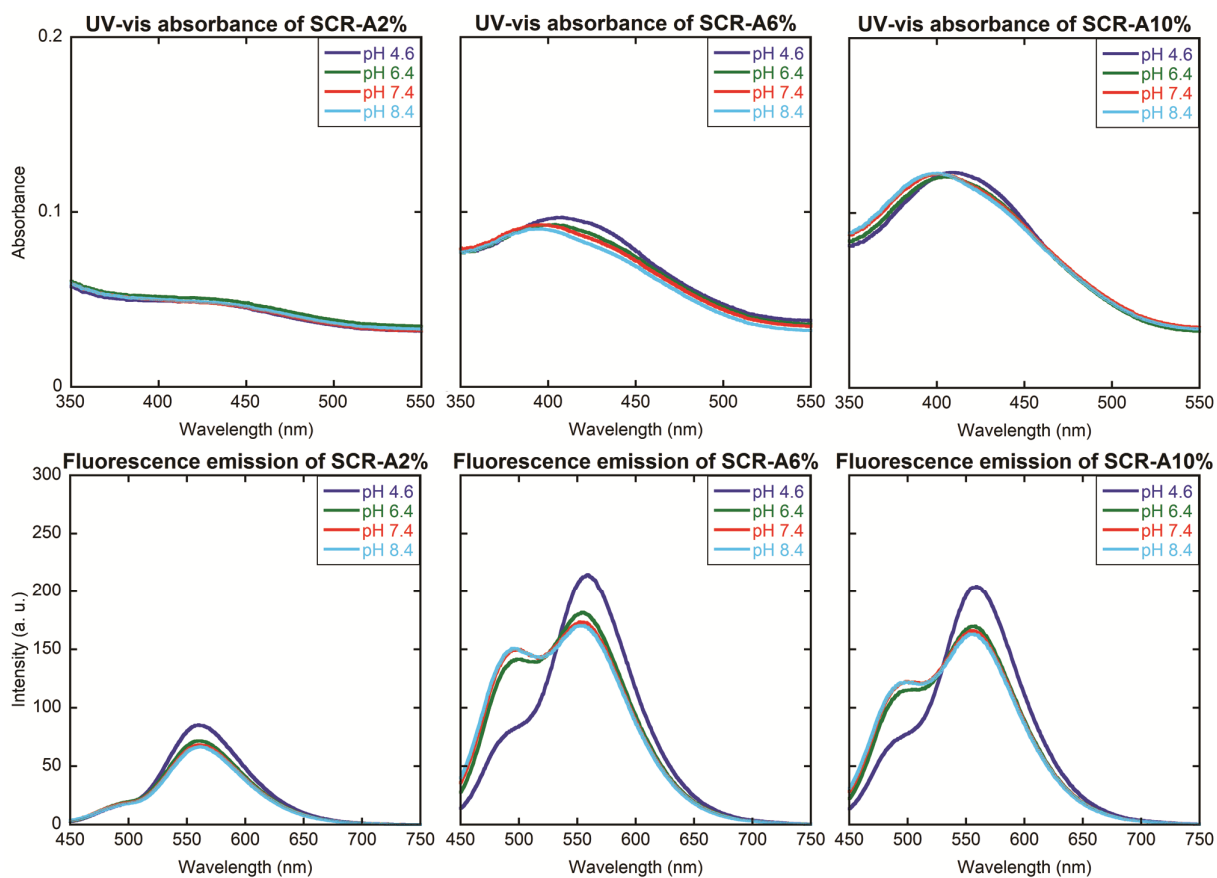

**Figure S2.** UV-vis absorbance and fluorescence emission spectra of SCR-A at 2%, 6% or 10% crosslinking density with the addition of a stoichiometric amount of EDCl, relative to the aliphatic amines of the crosslinker.

Supplementary Material (ESI) for Journal of Materials Chemistry  
This journal is (c) The Royal Society of Chemistry 2010

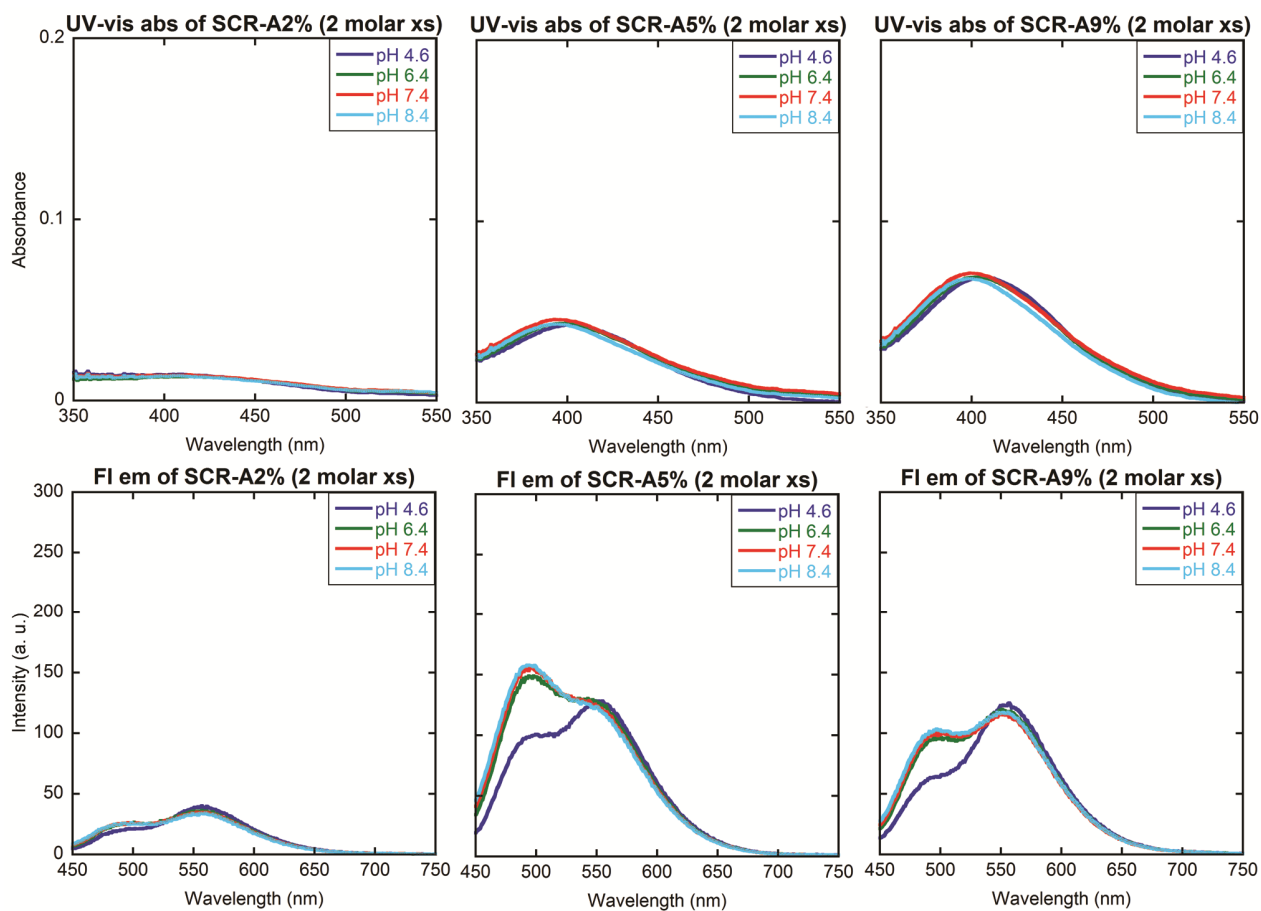

**Figure S3.** UV-vis absorbance and fluorescence emission spectra of SCR-A at 2%, 5% or 9% crosslinking density with the addition of a 2 molar excess amount of EDCl, relative to the aliphatic amines of the crosslinker.

Supplementary Material (ESI) for Journal of Materials Chemistry  
This journal is (c) The Royal Society of Chemistry 2010

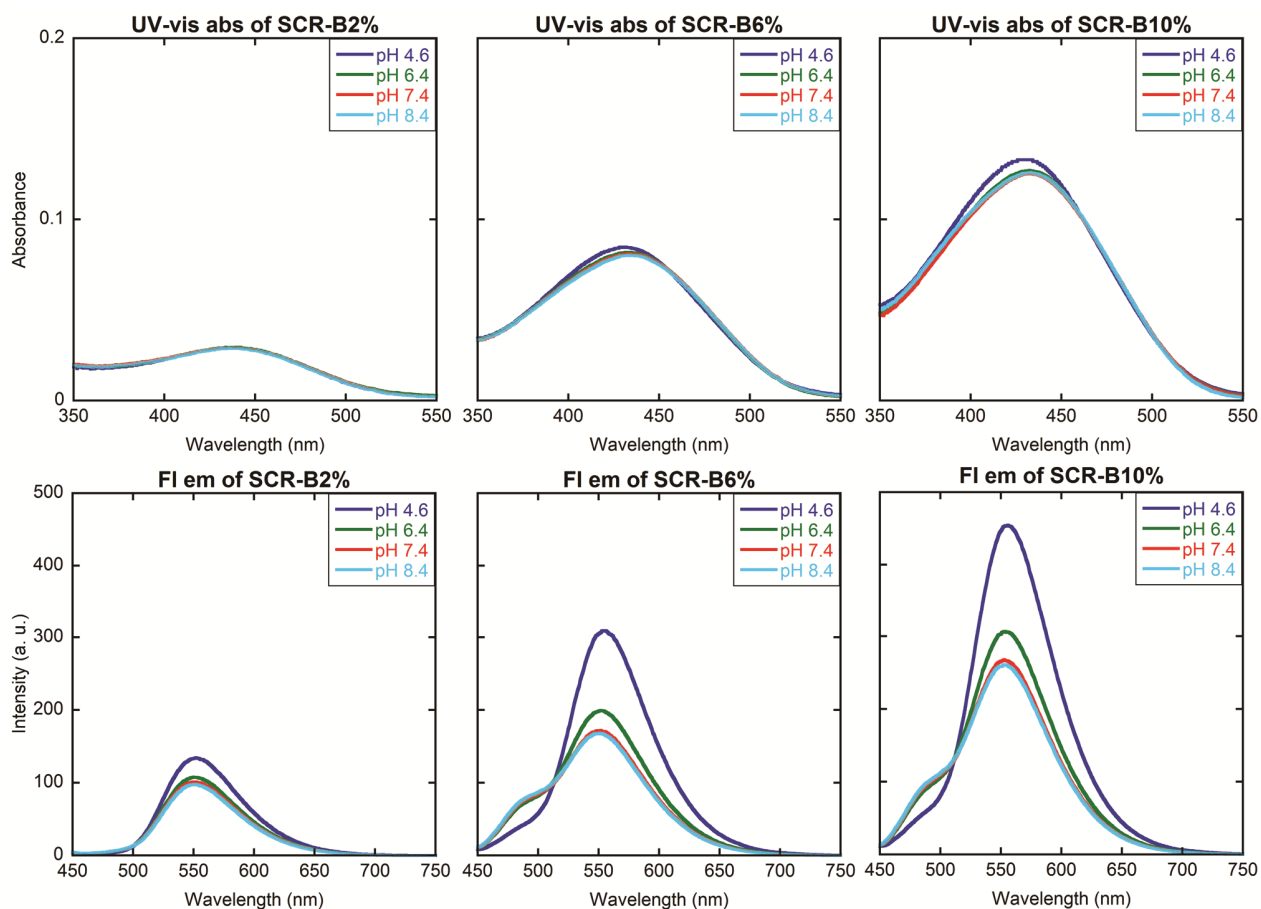

**Figure S4.** UV-vis absorbance and fluorescence emission spectra of SCR-B at 2%, 6% or 10% crosslinking density with the addition of a stoichiometric amount of EDCl, relative to the aliphatic amines of the crosslinker.

Supplementary Material (ESI) for Journal of Materials Chemistry  
This journal is (c) The Royal Society of Chemistry 2010

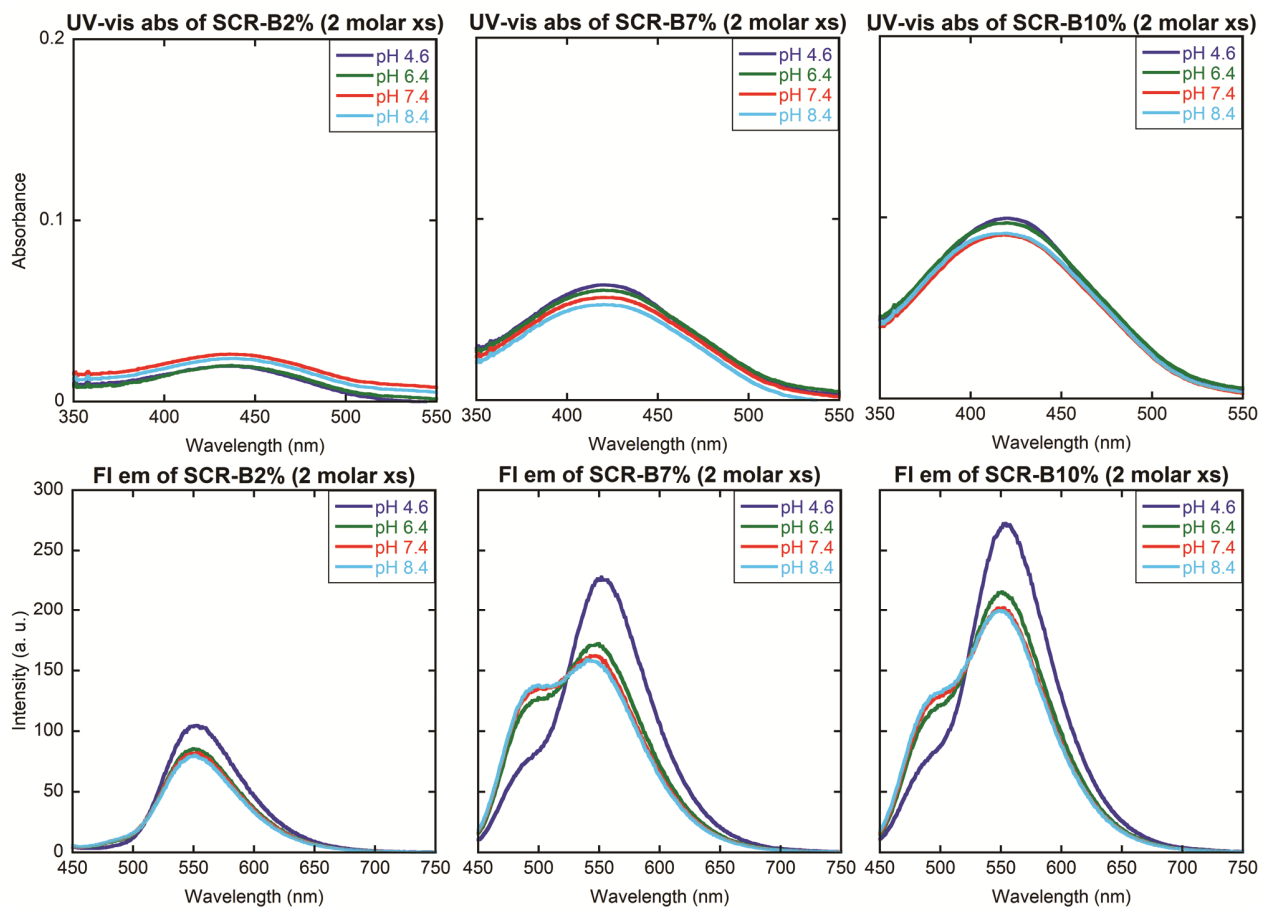

**Figure S5.** UV-vis absorbance and fluorescence emission spectra of SCR-B at 2%, 7% or 10% crosslinking density with the addition of a 2 molar excess amount of EDCI, relative to the aliphatic amines of the crosslinker.

Supplementary Material (ESI) for Journal of Materials Chemistry  
This journal is (c) The Royal Society of Chemistry 2010

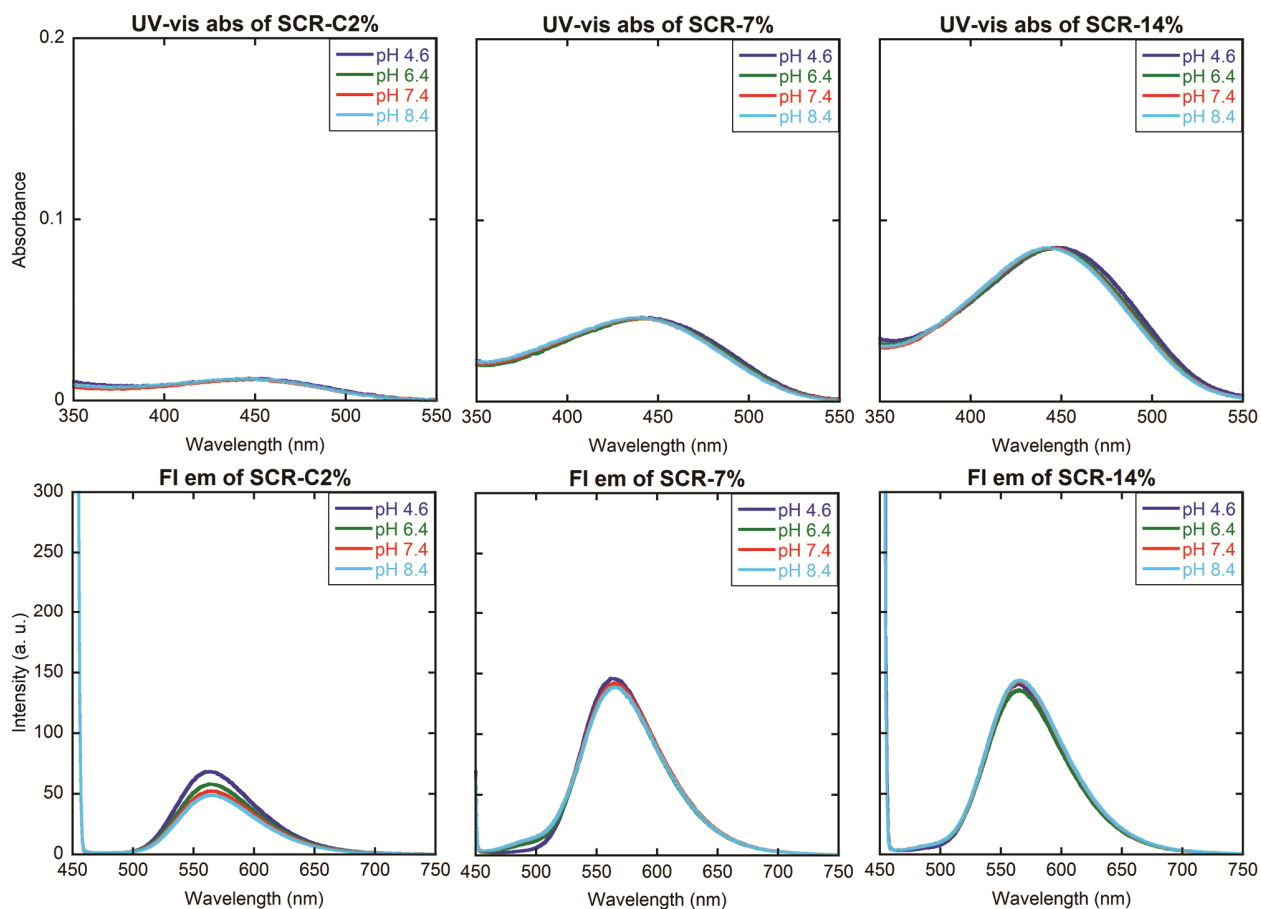

**Figure S6.** UV-vis absorbance and fluorescence emission spectra of SCR-C at 2%, 7% or 14% crosslinking density with the addition of a stoichiometric amount of EDCI, relative to the aliphatic amines of the crosslinker.

Supplementary Material (ESI) for Journal of Materials Chemistry  
This journal is (c) The Royal Society of Chemistry 2010

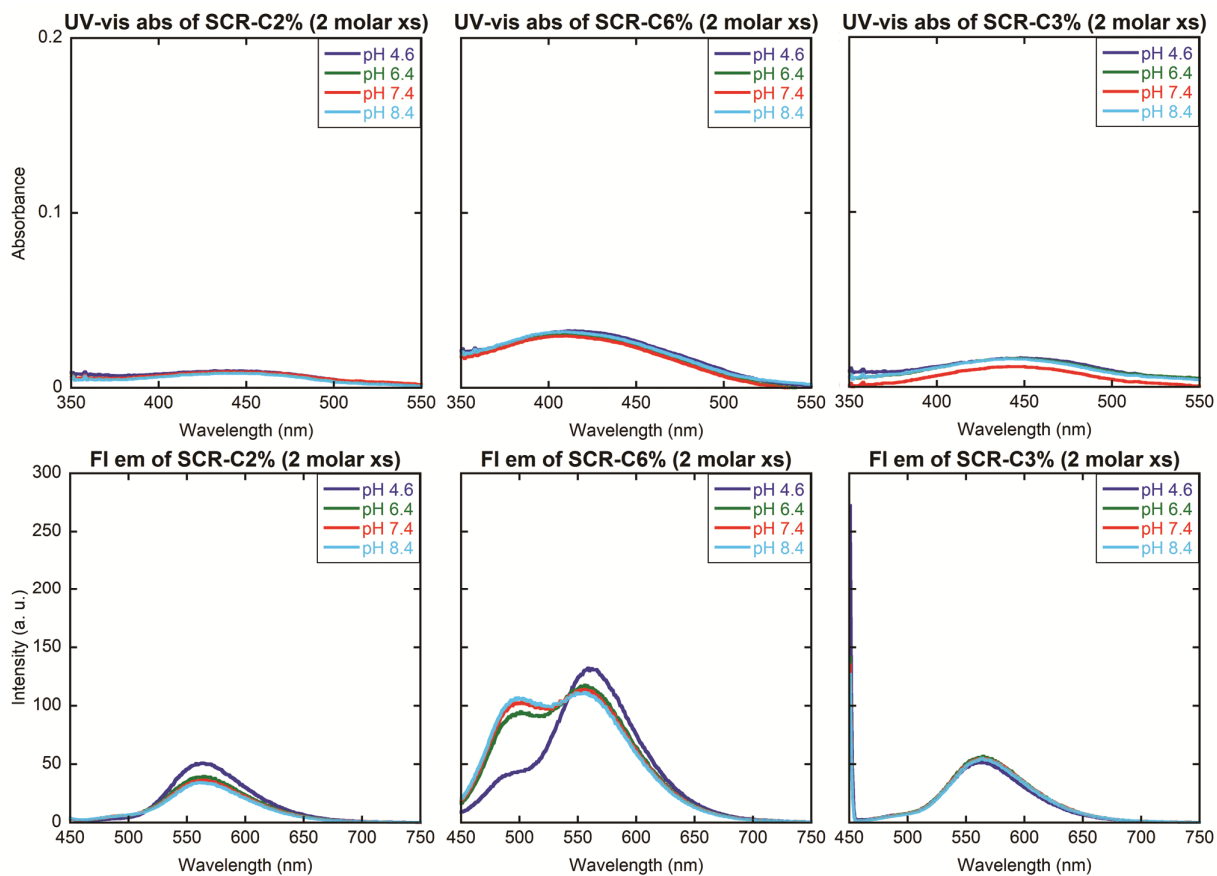

**Figure S7.** UV-vis absorbance and fluorescence emission spectra of SCR-C at 2%, 6% or 3% crosslinking density with the addition of a 2 molar excess amount of EDCI, relative to the aliphatic amines of the crosslinker.



Supplementary Material (ESI) for Journal of Materials Chemistry  
This journal is (c) The Royal Society of Chemistry 2010

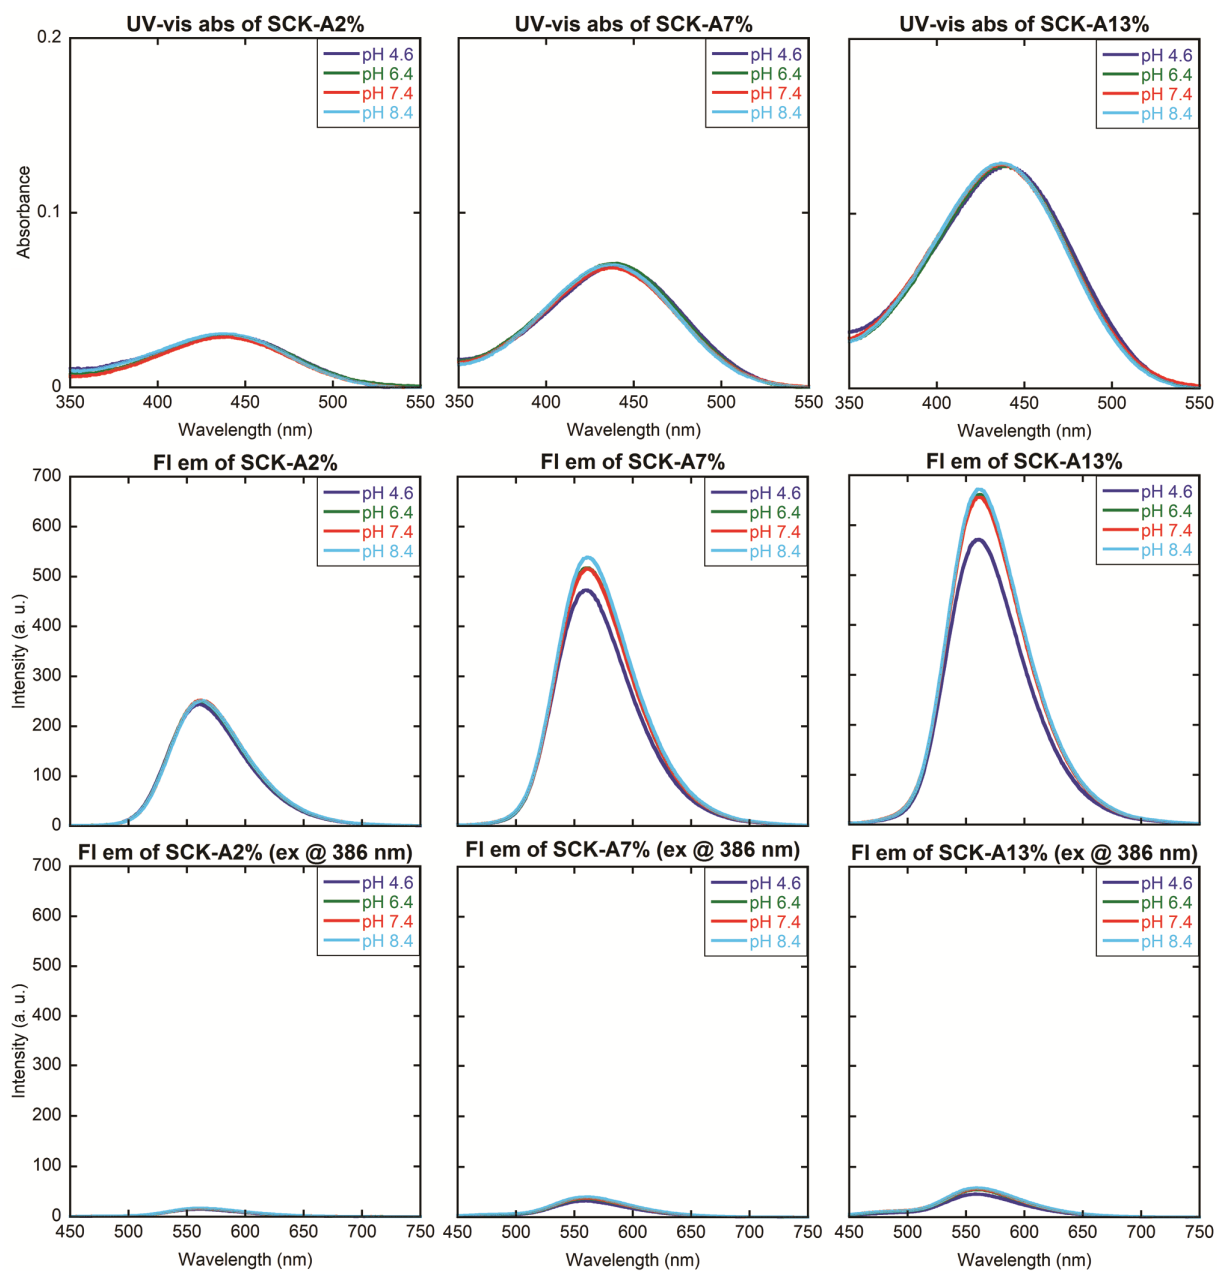

**Figure S8.** UV-vis absorbance and fluorescence emission spectra of SCK-A at 2%, 7% or 13% crosslinking density with the addition of a stoichiometric amount of EDCI, relative to the aliphatic amines of the crosslinker.

Supplementary Material (ESI) for Journal of Materials Chemistry  
This journal is (c) The Royal Society of Chemistry 2010

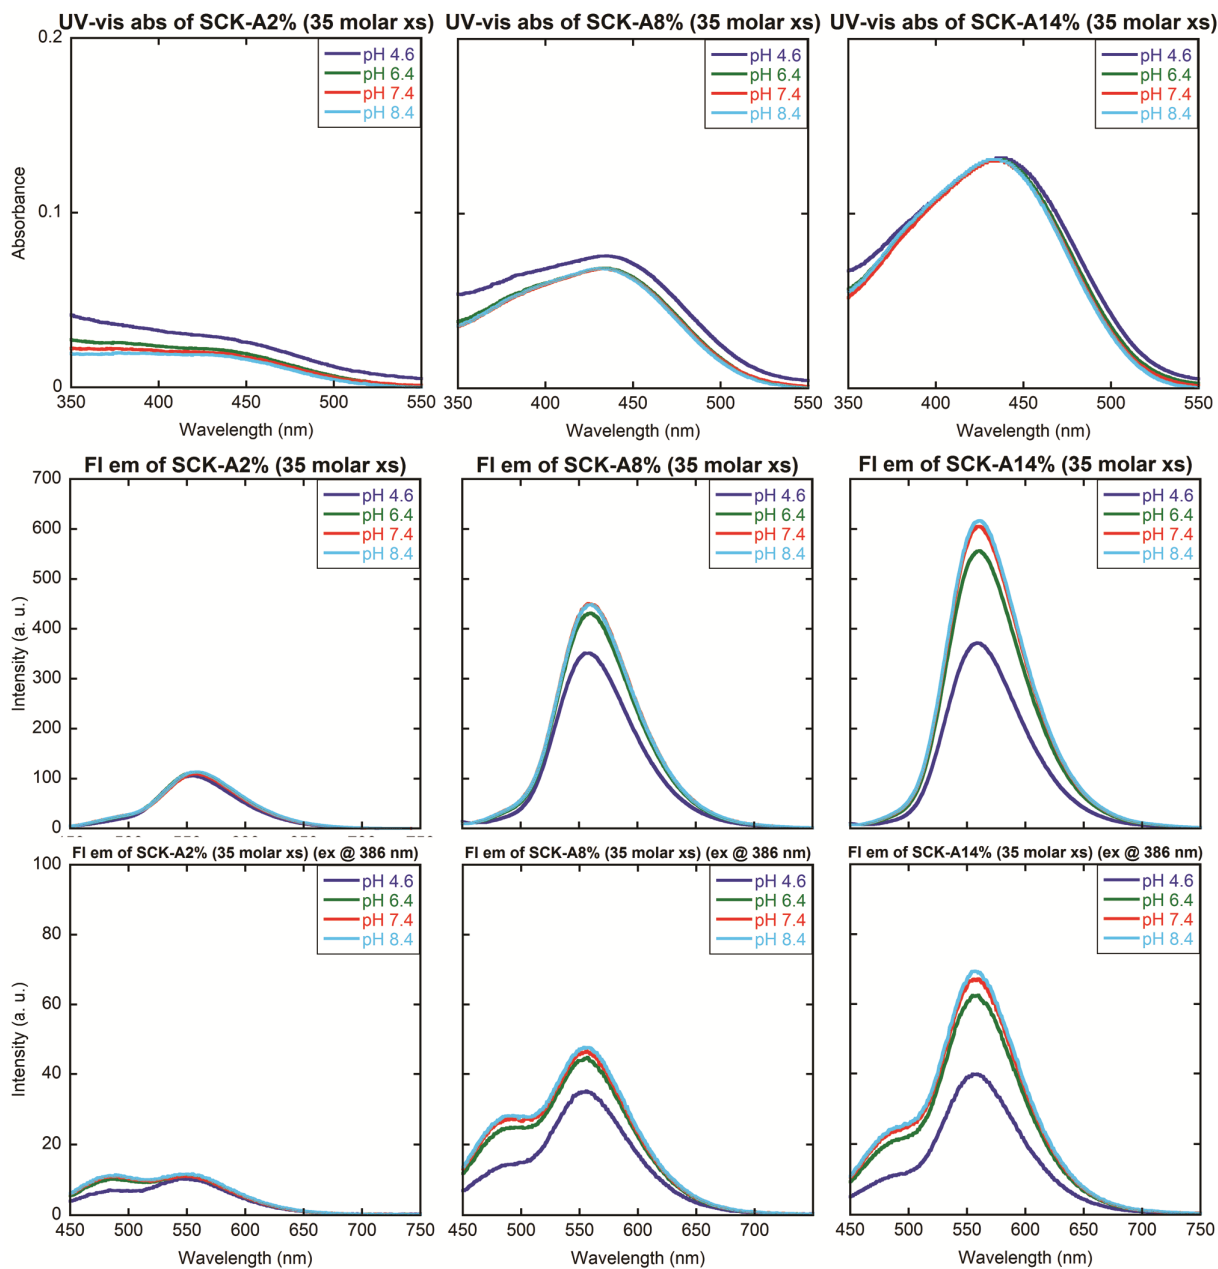

**Figure S9.** UV-vis absorbance and fluorescence emission spectra of SCK-A at 2%, 8% or 14% crosslinking density with the addition of a 35 molar excess amount of EDCl, relative to the aliphatic amines of the crosslinker.

Supplementary Material (ESI) for Journal of Materials Chemistry  
This journal is (c) The Royal Society of Chemistry 2010

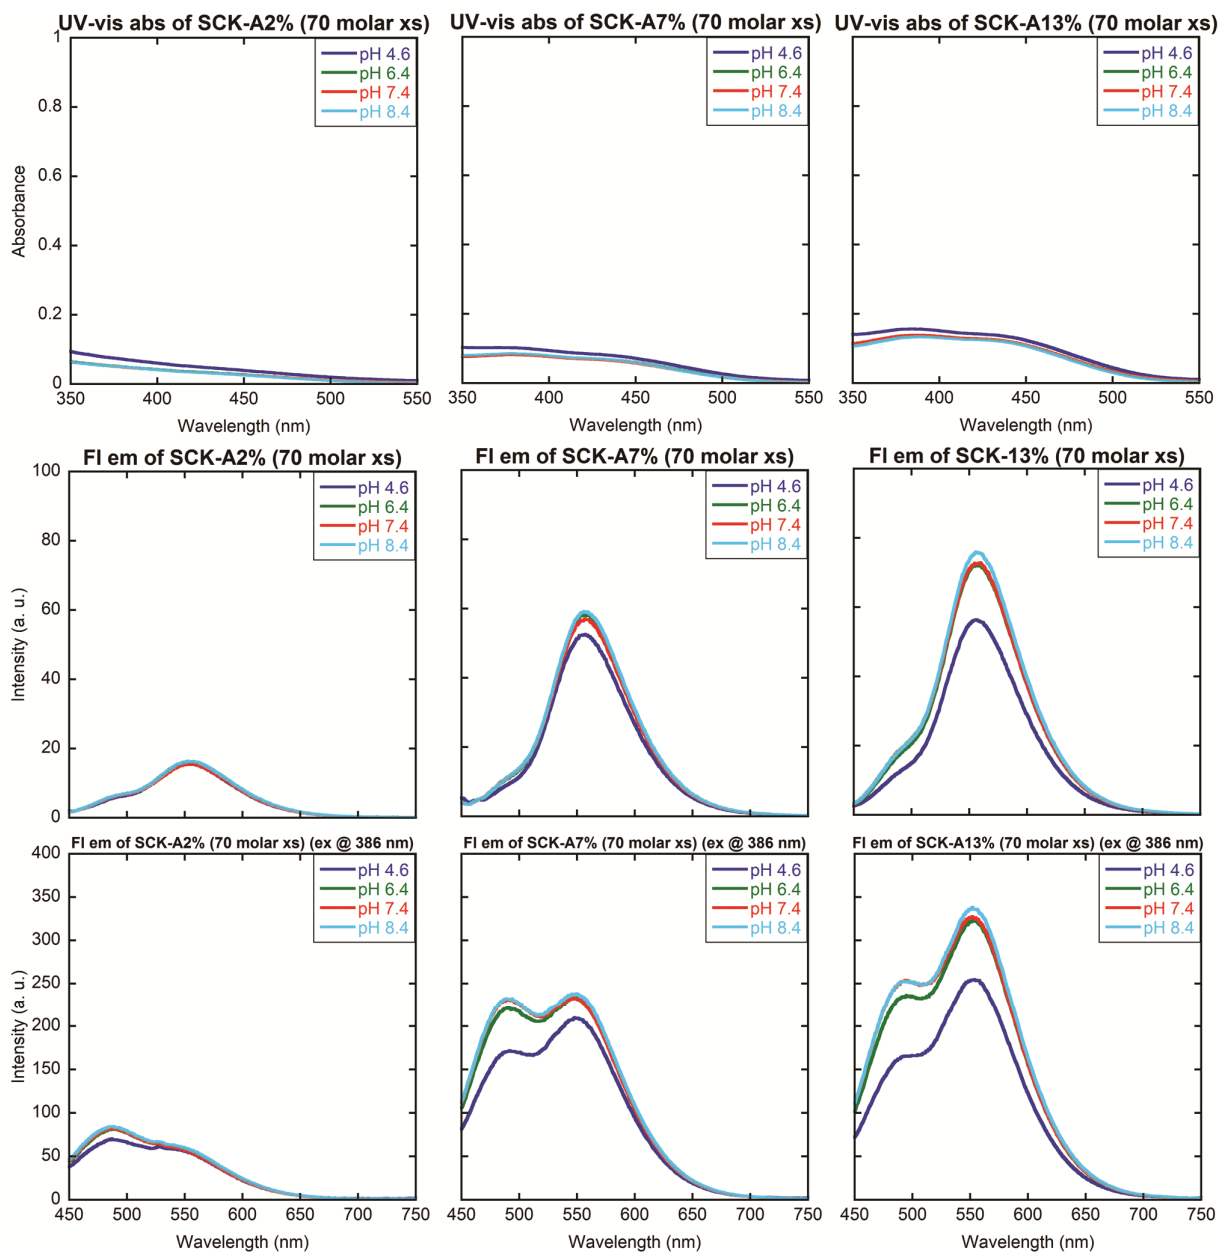

**Figure S10.** UV-vis absorbance and fluorescence emission spectra of SCK-A at 2%, 7% or 13% crosslinking density with the addition of a 75 molar excess amount of EDCI, relative to the aliphatic amines of the crosslinker.

Supplementary Material (ESI) for Journal of Materials Chemistry  
This journal is (c) The Royal Society of Chemistry 2010

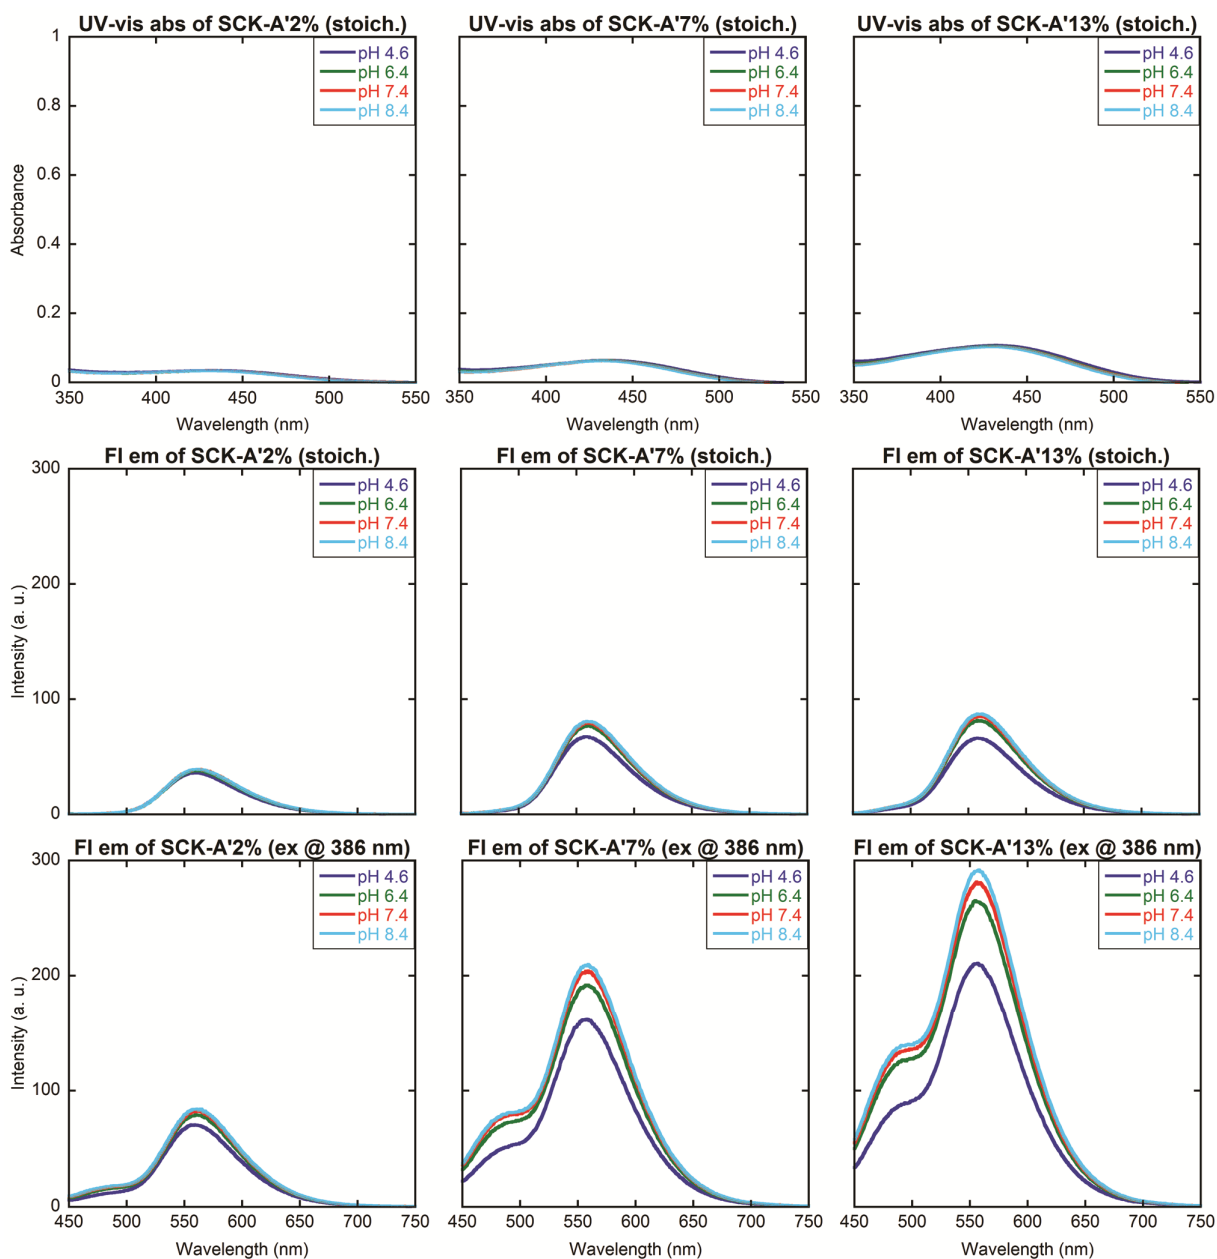

**Figure S11.** UV-vis absorbance and fluorescence emission spectra of SCK-A at 2%, 7% or 13% crosslinking density with two cycles of shell crosslinking reactions by addition of a stoichiometric amount of EDCI, relative to the aliphatic amines of the crosslinker.

Supplementary Material (ESI) for Journal of Materials Chemistry  
This journal is (c) The Royal Society of Chemistry 2010

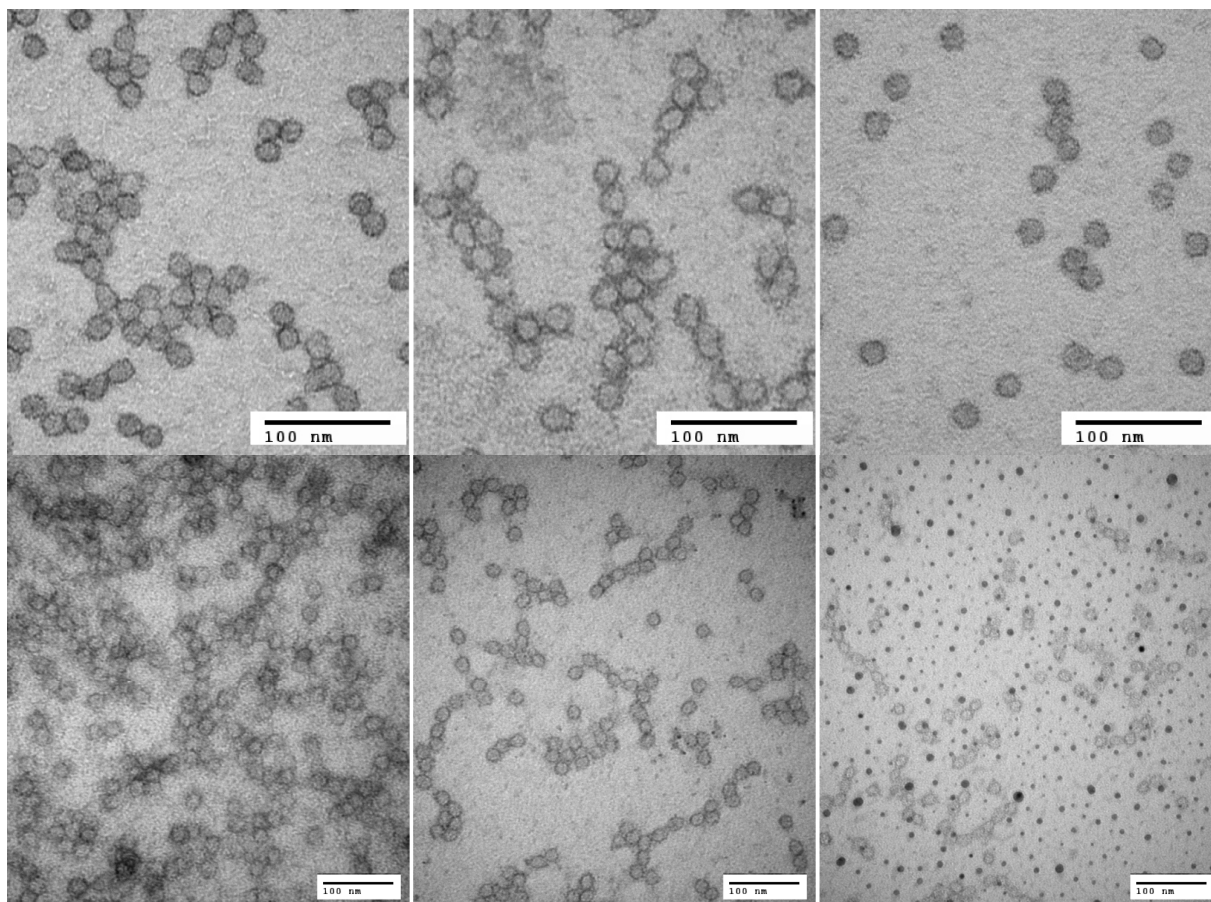

**Figure S12.** TEM images of sc-SCKs (top row, sc-SCK-As; bottom row, sc-SCK-Bs) in 5 mM of buffer with 5 mM of NaCl at pH 5.8 (left), pH 7.2 (middle), and 8.6 (right), respectively. The images were obtained after negatively stained with PTA.

Supplementary Material (ESI) for Journal of Materials Chemistry  
This journal is (c) The Royal Society of Chemistry 2010

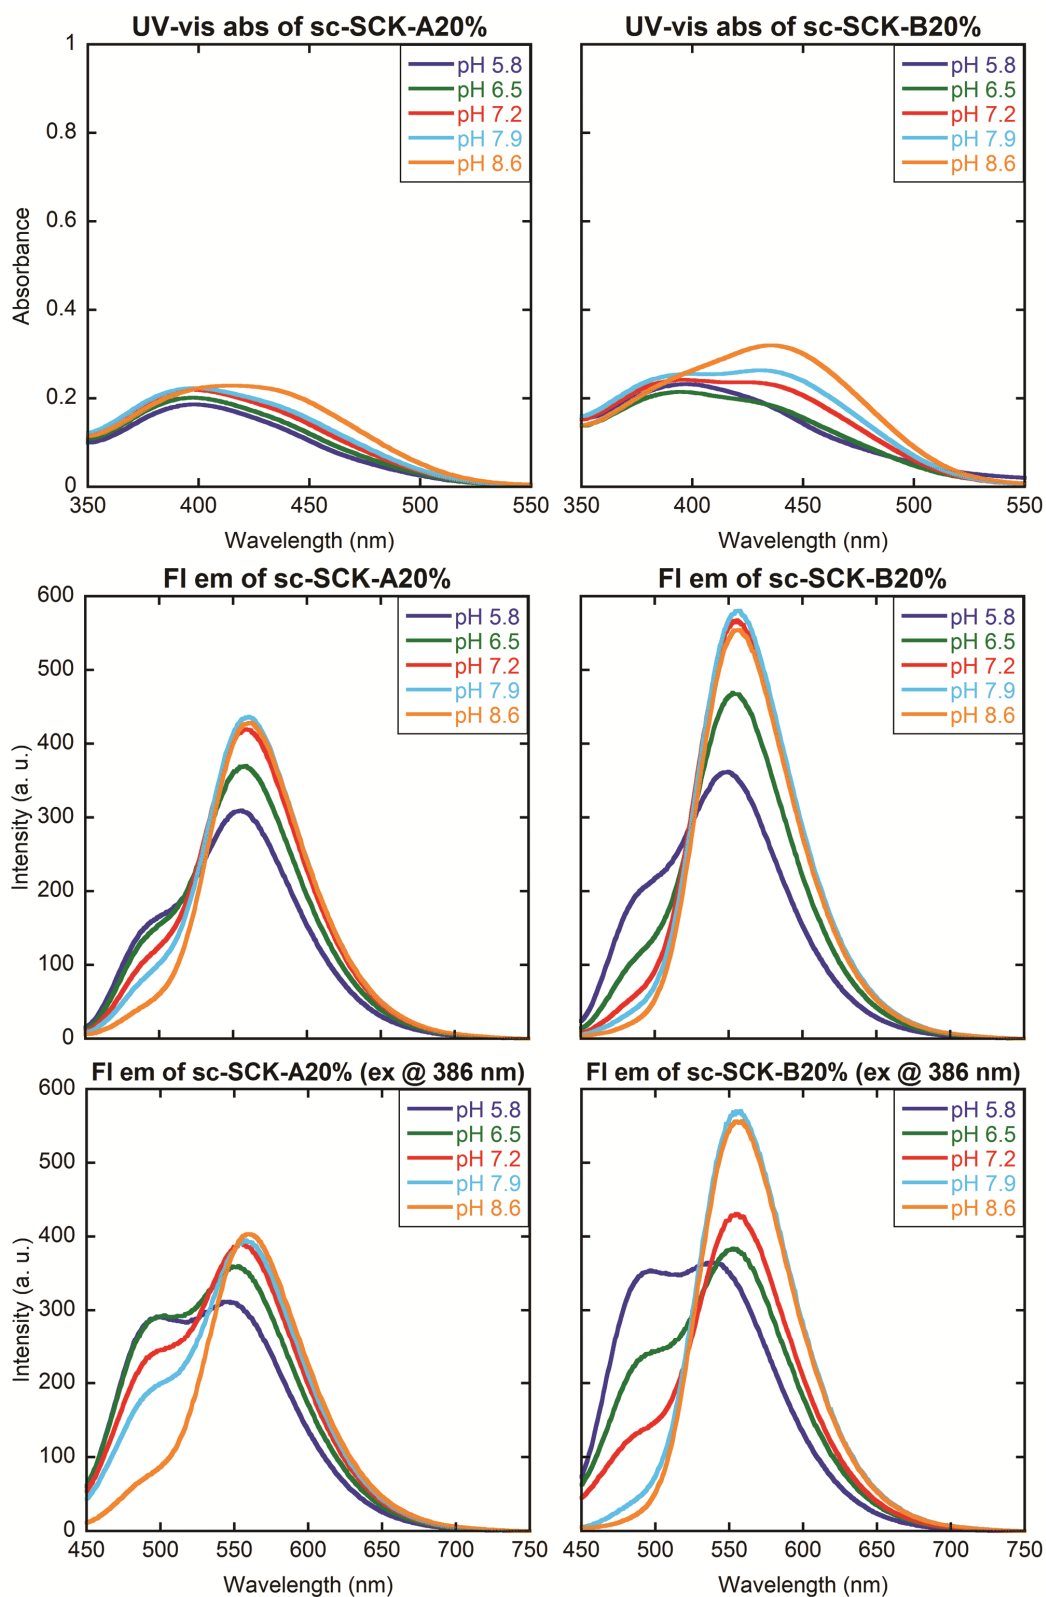

**Figure S13.** UV-vis absorbance and fluorescence emission spectra of sc-SCK-A and sc-SCK-B at 20% crosslinking density.

Supplementary Material (ESI) for Journal of Materials Chemistry  
This journal is (c) The Royal Society of Chemistry 2010

**Table S1** Properties of sc-SCKs and lc-SCKs

| Samples <sup>a</sup> | Media pH value <sup>b</sup> | $D_{h, \text{intensity}}$ (nm) <sup>c</sup> | $D_{av}$ (nm) <sup>d</sup> | $\lambda_{\text{abs, max}}$ (nm) |
|----------------------|-----------------------------|---------------------------------------------|----------------------------|----------------------------------|
| sc-SCK-A/lc-SCK-A    | 5.8                         | 48 ± 4/54 ± 2                               | 18 ± 1/23 ± 2              | 398/404                          |
| sc-SCK-A/lc-SCK-A    | 6.5                         | 48 ± 4/49 ± 1                               | ND <sup>e</sup>            | 398/408                          |
| sc-SCK-A/lc-SCK-A    | 7.2                         | 49 ± 2/49 ± 1                               | 19 ± 2/23 ± 2              | 398/413                          |
| sc-SCK-A/lc-SCK-A    | 7.9                         | 48 ± 3/52 ± 4                               | ND <sup>e</sup>            | 399/418                          |
| sc-SCK-A/lc-SCK-A    | 8.6                         | 49 ± 5/65 ± 3                               | 18 ± 1/23 ± 1              | 416/421                          |
| sc-SCK-B/lc-SCK-B    | 5.8                         | 48 ± 3/43 ± 3                               | 22 ± 1/26 ± 1              | 398/413                          |
| sc-SCK-B/lc-SCK-B    | 6.5                         | 49 ± 4/49 ± 2                               | ND <sup>e</sup>            | 398/413                          |
| sc-SCK-B/lc-SCK-B    | 7.2                         | 49 ± 2/50 ± 2                               | 21 ± 2/27 ± 2              | 397/421                          |
| sc-SCK-B/lc-SCK-B    | 7.9                         | 50 ± 2/48 ± 2                               | ND <sup>e</sup>            | 431/427                          |
| sc-SCK-B/lc-SCK-B    | 8.6                         | 40 ± 1/52 ± 2                               | 21 ± 2/26 ± 1              | 436/428                          |

<sup>a</sup> Sample concentrations were 0.20-0.30 mg/mL, **SCK2a-2e** and **SCK3a-3e** were prepared by using A and B as cross-linkers, respectively. <sup>b</sup> 5 mM buffer solutions (with 5 mM of NaCl). <sup>c</sup> Intensity-average hydrodynamic diameters with standard deviations between five runs. <sup>d</sup>  $D_{av}$  values were measured for the SCK core domains, for at least 100 particles. <sup>e</sup> Not determined.
